# Supplementary material for: Using hydrogenated and perfluorinated gases to probe the interactions and structure of fluorinated ionic liquids
Source: Royal Society of Chemistry journal article supplement (doi:10.1039/c9cp00593e), 2019-01-01
Supplement: c9cp00593e1.pdf [file c9cp00593e1.pdf]

## **Using hydrogenated and perfluorinated gases to probe the interactions and structure of fluorinated ionic liquids**

Luiz Fernando Lepre,<sup>a</sup> Laure Pison,<sup>b</sup> Ines Otero,<sup>b</sup> Arnaud Gautier,<sup>b</sup> Julien Dévemy,<sup>b</sup> Pascale Husson,<sup>b</sup> Agilio Padua<sup>a</sup> and Margarida Costa Gomes <sup>\*a</sup>

*\* margarida.costa-gomes@ens.lyon.fr*

*<sup>a</sup> Laboratoire de Chimie de l'ENS de Lyon, CNRS and ENS de Lyon, 69007 Lyon, France*

*<sup>b</sup> Institut de Chimie de Clermont-Ferrand, CNRS and Université Clermont Auvergne, Aubière, France*

**Supplementary Information**

## Synthesis of the ionic liquids

The toluene, 1-bromo hexane and 1-iodo-3,3,4,4,5,5,6,6,7,7,8,8,8-tridecafluoro octane samples were used for the synthesis as received. The ethyl acetate, dichloromethane and *N*-methyl imidazole samples were distilled prior to their use.

### *Synthesis of 1-octyl-3-methylimidazolium bromide, [C<sub>8</sub>C<sub>1</sub>Im][Br]:*

1-bromo hexane (27.8 g, 145 mmol, 1.18 equ.) was dissolved in 30 mL of toluene. *N*-methyl imidazole (10 g, 122 mmol, 1.0 equ.) dissolved in 20 mL of toluene was added and argon was bubbled for 30 minutes through the solution. The reaction was heated at 50°C for 48h under argon atmosphere. After cooling to room temperature, ethyl acetate (100 mL) was added, the solution was stirred for 30 minutes and the two observed layers were separated. The resulting product was left under high vacuum at 50°C for one day to furnish 28.4 g (85% yield) of a pale brownish liquid. <sup>1</sup>HNMR(dms<sub>o</sub>-d<sub>6</sub>, 400MHz) δ(ppm)= 9.09 (t, *J*<sup>4</sup>=1.8Hz, 1H); 7.76(t, *J*<sup>4</sup>=1.8Hz, 1H); 7.69(t, *J*<sup>4</sup>=1.8Hz, 1H); 4.14(t, *J*<sup>3</sup>=7.3Hz, 2H); 3.84 (s, 3H); 1.77(m, 2H); 1.25(m, 10H); 0.86(t, *J*<sup>3</sup>=6.8Hz, 3H).

### *Synthesis of 1-octyl-3-methylimidazolium bis(pentafluoroethylsulfonyl)amide, [C<sub>8</sub>C<sub>1</sub>Im][BETI]:*

[C<sub>8</sub>C<sub>1</sub>Im][Br] (4.81 g, 17.5 mmol, 1.0 eq.) was dissolved in 20 mL of bi-distilled water and then boiled in presence of 75-100 mg of charcoal for 30 minutes under argon atmosphere. After cooling to room temperature, the solution was filtered over a plug of celite and washed with 20 mL of bi-distilled water to furnish a colorless solution. [Li][BETI] (7.8 g, 20.15 mmol, 1.15 equ.) dissolved in 30 mL of bi-distilled water was then added under stirring. The solution was heated at 60°C for 2h and left at room temperature overnight. Bi-distilled water (50 mL) was added and the solution was extracted 5 times with dichloromethane (150 mL). The organic layer was dried over MgSO<sub>4</sub>, and then evaporated. The resulting product was dried under high vacuum at 60°C for two days to furnish 8.4 g of a colorless liquid (yield: 78%). <sup>1</sup>HNMR(dms<sub>o</sub>-d<sub>6</sub>, 400MHz) δ (ppm)= 9.09 (t, *J*<sup>4</sup>=1.8Hz, 1H); 7.76(t, *J*<sup>4</sup>=1.8Hz, 1H); 7.69(t, *J*<sup>4</sup>=1.8Hz, 1H); 4.14(t, *J*<sup>3</sup>=7.3Hz, 2H); 3.84 (s, 3H); 1.77(m, 2H); 1.25(m, 10H); 0.86(t, *J*<sup>3</sup>=6.8Hz, 3H).

### *Synthesis of 1-(3,3,4,4,5,5,6,6,7,7,8,8,8-tridecafluorooctyl)-3-methylimidazolium iodide, [C<sub>8</sub>H<sub>4</sub>F<sub>13</sub>C<sub>1</sub>Im][I]:*

*N*-Methyl Imidazole (3.77 g, 46.0 mmol, 1.0 equ.) was dissolved in 36 mL of toluene. 1-iodo(3,3,4,4,5,5,6,6,7,7,8,8,8-tridecafluoro)octane (24.0 g, 50.6 mmol, 1.1 equ.) was added and argon was bubbled through the solution for 30 minutes. The reaction flask was capped, heated for 2 days at 75°C and cooled to room temperature before being placed at -20°C for 4-6 hours to form yellow crystals. The solid was filtered, washed 3 times with ether (20 mL), one time with the pentane (20 mL) and dried on air to furnish 15.9 g of a yellow solid (62% yield) of melting point of 51-52°C. <sup>1</sup>H NMR (400 MHz, dms<sub>o</sub>-d<sub>6</sub>) δ (ppm): 9.21 (s, 1H); 7.89 (t, *J*<sup>3</sup>=1.7Hz, 1H); 7.74 (t, *J*<sup>3</sup>=1.8Hz, 1H); 4.57 (t, *J*<sup>3</sup>= 7.0, 2H); 3.02 (m, 2H); 3.88 (s, 3H). <sup>13</sup>C NMR (100 MHz, acetone-d<sub>6</sub>) δ (ppm): 139.0;

124.9; 123.8; 122-108: multiple untreatable signal (CF<sub>2</sub>), see Fig S0 ; 42.7 (t, J<sup>3</sup>= 5,4Hz); 37.4 ; 31.3 (t, J = 21.5Hz).

*Synthesis of 1-(3,3,4,4,5,5,6,6,7,7,8,8,8-tridecafluorooctyl)-3-methylimidazolium bis(trifluoromethylsulfonyl)amide, [C<sub>8</sub>H<sub>4</sub>F<sub>13</sub>C<sub>1</sub>Im][NTf<sub>2</sub>], and 1-(3,3,4,4,5,5,6,6,7,7,8,8,8-tridecafluorooctyl)-3-methylimidazolium bis(pentafluoroethylsulfonyl)amide, [C<sub>8</sub>H<sub>4</sub>F<sub>13</sub>C<sub>1</sub>Im][BETI]:*

[C<sub>8</sub>H<sub>4</sub>F<sub>13</sub>C<sub>1</sub>Im][I] (14.0 g, 25.2 mmol, 1.0 equ.) was dissolved in 130 mL of bi-distilled water and the solution was heated at 60°C and 1.2 equ. of [Li][NTf<sub>2</sub>] or [Li][BETI], dissolved in 85 mL of bi-distilled water, were added dropwise under vigorous stirring. The solution was stirred for 2 hours at 60°C to furnish two layers. After cooling to room temperature, 550 mL of dichloromethane and 250mL of bi-distilled water were added, the solution was vigorously stirred for 20 minutes then the layers were separated. The organic layer was washed 5 times with bi-distilled water – when silver test of the aqueous phase becomes negative. The organic layer was dried over MgSO<sub>4</sub>, evaporated and then dried under high vacuum for two days to furnish a pale yellow liquid that spontaneously solidify after several days. This procedure rendered 11.0 g of [C<sub>8</sub>H<sub>4</sub>F<sub>13</sub>C<sub>1</sub>Im][NTf<sub>2</sub>] (yield: 60%) or 13.1 g of [C<sub>8</sub>H<sub>4</sub>F<sub>13</sub>C<sub>1</sub>Im][BETI] (yield: 63%). C<sub>8</sub>H<sub>4</sub>F<sub>13</sub>C<sub>1</sub>Im][NTf<sub>2</sub>] and [C<sub>8</sub>H<sub>4</sub>F<sub>13</sub>C<sub>1</sub>Im][BETI] <sup>1</sup>H NMR (400 MHz, acetone-d<sub>6</sub>) δ (ppm): 9.28 (s, 1H); 7.78 (t, J<sup>3</sup>=1,8Hz, 1H); 7.95 (t, J<sup>3</sup>=1.8Hz, 1H); 4.85 (t, J<sup>3</sup>=7,3Hz, 2H); 4.09 (s, 3H); 3.13 (m, 2H). [C<sub>8</sub>H<sub>4</sub>F<sub>13</sub>C<sub>1</sub>Im][NTf<sub>2</sub>], <sup>13</sup>C NMR (100 MHz, dmsO-d<sub>6</sub>) δ (ppm): 137.8; 124.0; 122.9; 120.0 (q, J<sup>1</sup> = 320Hz); 120-108: multiple untreatable signal (CF<sub>2</sub>), see Fig S0; 41.8 (t, J = 5.4Hz, CH<sub>2</sub>); 35.9; 31.0 (t, J = 21.5Hz). [C<sub>8</sub>H<sub>4</sub>F<sub>13</sub>C<sub>1</sub>Im][BETI], <sup>13</sup>C NMR (100 MHz, acetone-d<sub>6</sub>) δ (ppm): 137.7; 124.9; 123.2; 125-108: multiple untreatable signal (CF<sub>2</sub>), see Fig S0; 42.3 (t, J = 5.4Hz, CH<sub>2</sub>); 36.8; 31.5 (t, J = 21.5Hz).

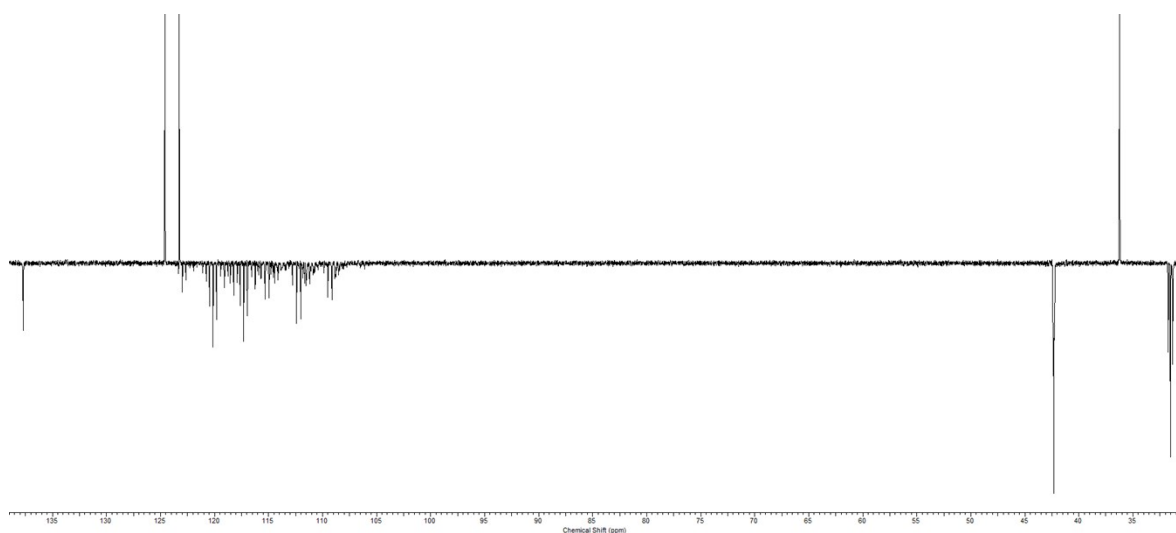

**Figure S0.** <sup>13</sup>C spectrum of synthesized [C<sub>8</sub>H<sub>4</sub>F<sub>13</sub>C<sub>1</sub>Im][BETI] in acetone-d<sub>6</sub>.

**Table S1.** Density of the pure ionic liquids and of the mixtures studied.

| T / K                                                                                                                                                  | $\rho$ / g cm <sup>-3</sup> | T / K                                                                                | $\rho$ / g cm <sup>-3</sup>                                             | T / K                                    | $\rho$ / g cm <sup>-3</sup> |
|--------------------------------------------------------------------------------------------------------------------------------------------------------|-----------------------------|--------------------------------------------------------------------------------------|-------------------------------------------------------------------------|------------------------------------------|-----------------------------|
| [C <sub>8</sub> C <sub>1</sub> Im][NTf <sub>2</sub> ]                                                                                                  |                             | [C <sub>8</sub> H <sub>4</sub> F <sub>13</sub> C <sub>1</sub> Im][NTf <sub>2</sub> ] |                                                                         | [C <sub>8</sub> C <sub>1</sub> Im][BETI] |                             |
| 293.15                                                                                                                                                 | 1.324821                    | 293.15                                                                               | 1.728094                                                                | 293.15                                   | 1.400916                    |
| 303.15                                                                                                                                                 | 1.315904                    | 303.15                                                                               | 1.715452                                                                | 303.15                                   | 1.391097                    |
| 313.15                                                                                                                                                 | 1.307060                    | 313.15                                                                               | 1.702909                                                                | 313.15                                   | 1.381319                    |
| 323.15                                                                                                                                                 | 1.298274                    | 323.15                                                                               | 1.690449                                                                | 323.15                                   | 1.371608                    |
| 333.15                                                                                                                                                 | 1.289546                    | 333.15                                                                               | 1.677993                                                                | 333.15                                   | 1.361959                    |
| 343.15                                                                                                                                                 | 1.280871                    | 343.15                                                                               | 1.665606                                                                | 343.15                                   | 1.352366                    |
| 353.15                                                                                                                                                 | 1.272243                    | 353.15                                                                               | 1.653294                                                                | 353.15                                   | 1.342818                    |
| 293.15                                                                                                                                                 | 1.324786                    |                                                                                      |                                                                         | 293.15                                   | 1.400910                    |
| 303.15                                                                                                                                                 | 1.315890                    |                                                                                      |                                                                         | 303.15                                   | 1.391096                    |
| 313.15                                                                                                                                                 | 1.307045                    |                                                                                      |                                                                         | 313.15                                   | 1.381317                    |
| 323.15                                                                                                                                                 | 1.298262                    |                                                                                      |                                                                         | 323.15                                   | 1.371608                    |
| 333.15                                                                                                                                                 | 1.289535                    |                                                                                      |                                                                         | 333.15                                   | 1.361956                    |
| 343.15                                                                                                                                                 | 1.280859                    |                                                                                      |                                                                         | 343.15                                   | 1.352365                    |
| 353.15                                                                                                                                                 | 1.272230                    |                                                                                      |                                                                         | 353.15                                   | 1.342819                    |
| [C <sub>8</sub> C <sub>1</sub> Im] <sub>x</sub> [C <sub>8</sub> H <sub>4</sub> F <sub>13</sub> C <sub>1</sub> Im] <sub>(1-x)</sub> [NTf <sub>2</sub> ] |                             |                                                                                      | [C <sub>8</sub> H <sub>4</sub> F <sub>13</sub> C <sub>1</sub> Im][BETI] |                                          |                             |
| x = 0.8996                                                                                                                                             |                             | x = 0.6025                                                                           |                                                                         |                                          |                             |
| 293.15                                                                                                                                                 | 1.368592                    | 293.15                                                                               | 1.493303                                                                | 318.15                                   | 1.723065                    |
| 298.15                                                                                                                                                 | 1.363935                    | 298.15                                                                               | 1.488086                                                                | 323.15                                   | 1.716578                    |
| 303.15                                                                                                                                                 | 1.359284                    | 303.15                                                                               | 1.482862                                                                | 333.15                                   | 1.703584                    |
| 313.15                                                                                                                                                 | 1.350033                    | 313.15                                                                               | 1.472442                                                                | 343.15                                   | 1.690584                    |
| 323.15                                                                                                                                                 | 1.340850                    | 323.15                                                                               | 1.462095                                                                | 353.15                                   | 1.677639                    |
| 333.15                                                                                                                                                 | 1.331725                    | 333.15                                                                               | 1.451823                                                                | 318.15                                   | 1.723079                    |
| 343.15                                                                                                                                                 | 1.322657                    | 343.15                                                                               | 1.441613                                                                | 313.15                                   | 1.729653                    |
| 353.15                                                                                                                                                 | 1.313638                    | 353.15                                                                               | 1.431460                                                                |                                          |                             |

**Table S2.** Parameters  $A_0$  and  $A_1$  for linear fitting of density as a function of temperature as  $\rho(\text{gcm}^{-3}) = A_0 + A_1T(\text{K})$ .  $\sigma$  stands for the standard deviation of the resulting fit.

| Ionic liquid                                                           | $A_0 / \text{g cm}^{-3}$ | $A_1 / \text{g cm}^{-3} \text{ K}^{-1}$ | $\sigma / \%$ |
|------------------------------------------------------------------------|--------------------------|-----------------------------------------|---------------|
| $[\text{C}_8\text{C}_1\text{Im}][\text{NTf}_2]$                        | 1.58146                  | $- 0.87600 \times 10^{-3}$              | 0.01          |
| $[\text{C}_8\text{H}_4\text{F}_{13}\text{C}_1\text{Im}][\text{NTf}_2]$ | 2.09334                  | $- 1.24647 \times 10^{-3}$              | 0.03          |
| $[\text{C}_8\text{C}_1\text{Im}][\text{BETI}]$                         | 1.68461                  | $- 0.96824 \times 10^{-3}$              | 0.01          |
| $[\text{C}_8\text{H}_4\text{F}_{13}\text{C}_1\text{Im}][\text{BETI}]$  | 2.13657                  | $- 1.29963 \times 10^{-3}$              | 0.01          |

**Table S3.** Excess molar volumes,  $V^E$ , for  $[\text{C}_8\text{C}_1\text{Im}]_x[\text{C}_8\text{H}_4\text{F}_{13}\text{C}_1\text{Im}]_{(1-x)}[\text{NTf}_2]$  mixtures as a function of temperature and composition.

| x      | $V^E / \text{cm}^3 \text{ mol}^{-1}$ |       |       |       |       |       |       |       |
|--------|--------------------------------------|-------|-------|-------|-------|-------|-------|-------|
|        | 293 K                                | 298 K | 303 K | 313 K | 323 K | 333 K | 343 K | 353 K |
| 0.0000 | 0.000                                | 0.000 | 0.000 | 0.000 | 0.000 | 0.000 | 0.000 | 0.000 |
| 0.6025 | 1.217                                | 1.243 | 1.271 | 1.322 | 1.355 | 1.368 | 1.364 | 1.344 |
| 0.8996 | 0.457                                | 0.481 | 0.504 | 0.537 | 0.552 | 0.551 | 0.534 | 0.502 |
| 1.0000 | 0.000                                | 0.000 | 0.000 | 0.000 | 0.000 | 0.000 | 0.000 | 0.000 |

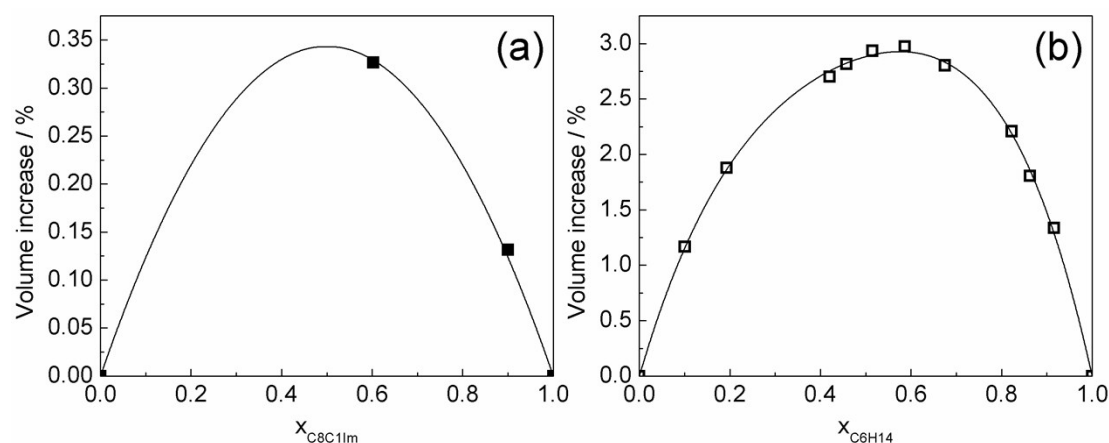

**Figure S1.** Volume increase upon mixing (a)  $[\text{C}_8\text{C}_1\text{Im}][\text{NTf}_2]$  with  $[\text{C}_8\text{H}_4\text{F}_{13}\text{C}_1\text{Im}][\text{NTf}_2]$  and (b)  $\text{C}_6\text{H}_{14}$  with  $\text{C}_6\text{F}_{14}$  at 298 K. For (b) density data were collected from Bedford and Dunlap.<sup>1</sup> Symbols represent experimental values while solid lines represent the best Redlich-Kister fittings.

**Table S4.** Stoichiometric data and heat effects of the calorimetry experiments with the system  $[\text{C}_8\text{H}_4\text{F}_{13}\text{C}_1\text{Im}][\text{NTf}_2](1) + [\text{C}_8\text{C}_1\text{Im}][\text{NTf}_2](2)$  at 313.15 K. The subscripts c and d stands for cell (or container) and dispenser (or syringe), respectively.

| $n_{1c} / \text{mol}$ | $n_{2c} / \text{mol}$ | $n_{1d} / \text{mmol}$ | $n_{2d} / \text{mmol}$ | Q / J    |
|-----------------------|-----------------------|------------------------|------------------------|----------|
| 8.12949E-06           | 1.99434E-03           | 2.70983E-03            | 2.42805E-02            | 1.21E-03 |
| 1.08393E-05           | 2.01862E-03           | 2.70983E-03            | 2.42805E-02            | 1.15E-03 |
| 1.35492E-05           | 2.04290E-03           | 2.70983E-03            | 2.42805E-02            | 1.14E-03 |
| 1.62590E-05           | 2.06718E-03           | 2.70983E-03            | 2.42805E-02            | 1.04E-03 |
| 1.89688E-05           | 2.09146E-03           | 2.70983E-03            | 2.42805E-02            | 1.04E-03 |
| 2.16787E-05           | 2.11574E-03           | 2.70983E-03            | 2.42805E-02            | 9.4E-04  |
| 2.43885E-05           | 2.14002E-03           | 2.70983E-03            | 2.42805E-02            | 9.2E-04  |
| 2.70983E-05           | 2.16431E-03           | 2.70983E-03            | 2.42805E-02            | 9.7E-04  |
| 2.98081E-05           | 2.18859E-03           | 2.70983E-03            | 2.42805E-02            | 8.8E-04  |
| 3.25180E-05           | 2.21287E-03           | 2.70983E-03            | 2.42805E-02            | 9.3E-04  |
| 3.52278E-05           | 2.23715E-03           | 2.70983E-03            | 2.42805E-02            | 9.0E-04  |
| 3.79376E-05           | 2.26143E-03           | 2.70983E-03            | 2.42805E-02            | 8.2E-04  |
| 4.06475E-05           | 2.28571E-03           | 2.70983E-03            | 2.42805E-02            | 8.0E-04  |
| 4.33573E-05           | 2.30999E-03           | 2.70983E-03            | 2.42805E-02            | 7.7E-04  |
| 4.60671E-05           | 2.33427E-03           | 2.70983E-03            | 2.42805E-02            | 7.8E-04  |
| 4.87770E-05           | 2.35855E-03           | 2.70983E-03            | 2.42805E-02            | 6.8E-04  |
| 5.14868E-05           | 2.38283E-03           | 2.70983E-03            | 2.42805E-02            | 7.3E-04  |
| 8.12949E-06           | 2.00274E-03           | 2.70983E-03            | 2.42805E-02            | 1.13E-03 |
| 1.08393E-05           | 2.02702E-03           | 2.70983E-03            | 2.42805E-02            | 1.03E-03 |
| 1.35492E-05           | 2.05130E-03           | 2.70983E-03            | 2.42805E-02            | 1.10E-03 |
| 1.62590E-05           | 2.07558E-03           | 2.70983E-03            | 2.42805E-02            | 1.12E-03 |
| 1.89688E-05           | 2.09986E-03           | 2.70983E-03            | 2.42805E-02            | 1.02E-03 |
| 2.16787E-05           | 2.12414E-03           | 2.70983E-03            | 2.42805E-02            | 8.5E-04  |
| 2.43885E-05           | 2.14842E-03           | 2.70983E-03            | 2.42805E-02            | 9.2E-04  |
| 2.70983E-05           | 2.17271E-03           | 2.70983E-03            | 2.42805E-02            | 1.10E-03 |
| 2.98081E-05           | 2.19699E-03           | 2.70983E-03            | 2.42805E-02            | 9.2E-04  |
| 3.25180E-05           | 2.22127E-03           | 2.70983E-03            | 2.42805E-02            | 8.9E-04  |
| 3.52278E-05           | 2.24555E-03           | 2.70983E-03            | 2.42805E-02            | 9.3E-04  |
| 3.79376E-05           | 2.26983E-03           | 2.70983E-03            | 2.42805E-02            | 9.0E-04  |

|             |             |             |             |           |
|-------------|-------------|-------------|-------------|-----------|
| 4.06475E-05 | 2.29411E-03 | 2.70983E-03 | 2.42805E-02 | 8.0E-04   |
| 4.33573E-05 | 2.31839E-03 | 2.70983E-03 | 2.42805E-02 | 7.2E-04   |
| 4.60671E-05 | 2.34267E-03 | 2.70983E-03 | 2.42805E-02 | 8.0E-04   |
| 4.87770E-05 | 2.36695E-03 | 2.70983E-03 | 2.42805E-02 | 7.8E-04   |
| 5.14868E-05 | 2.39123E-03 | 2.70983E-03 | 2.42805E-02 | 6.6E-04   |
| 7.01400E-04 | 1.14572E-03 | 0.00000E+00 | 2.74741E-02 | 1.350E-02 |
| 7.01400E-04 | 1.17320E-03 | 0.00000E+00 | 2.74741E-02 | 1.334E-02 |
| 7.01400E-04 | 1.20067E-03 | 0.00000E+00 | 2.74741E-02 | 1.289E-02 |
| 7.01400E-04 | 1.22814E-03 | 0.00000E+00 | 2.74741E-02 | 1.243E-02 |
| 7.01400E-04 | 1.25562E-03 | 0.00000E+00 | 2.74741E-02 | 1.225E-02 |
| 7.01400E-04 | 1.28309E-03 | 0.00000E+00 | 2.74741E-02 | 1.182E-02 |
| 7.01400E-04 | 1.31057E-03 | 0.00000E+00 | 2.74741E-02 | 1.140E-02 |
| 7.01400E-04 | 1.33804E-03 | 0.00000E+00 | 2.74741E-02 | 1.093E-02 |
| 7.01400E-04 | 1.36552E-03 | 0.00000E+00 | 2.74741E-02 | 1.090E-02 |
| 7.01400E-04 | 1.39299E-03 | 0.00000E+00 | 2.74741E-02 | 1.057E-02 |
| 7.01400E-04 | 1.42046E-03 | 0.00000E+00 | 2.74741E-02 | 1.039E-02 |
| 7.01400E-04 | 1.44794E-03 | 0.00000E+00 | 2.74741E-02 | 9.71E-03  |
| 7.01400E-04 | 1.47541E-03 | 0.00000E+00 | 2.74741E-02 | 9.26E-03  |
| 7.01400E-04 | 1.50289E-03 | 0.00000E+00 | 2.74741E-02 | 8.92E-03  |
| 7.01400E-04 | 1.53036E-03 | 0.00000E+00 | 2.74741E-02 | 8.91E-03  |
| 7.01400E-04 | 1.55783E-03 | 0.00000E+00 | 2.74741E-02 | 9.10E-03  |
| 7.01400E-04 | 1.58531E-03 | 0.00000E+00 | 2.74741E-02 | 8.90E-03  |
| 7.20000E-04 | 1.17392E-03 | 0.00000E+00 | 2.74741E-02 | 1.315E-02 |
| 7.20000E-04 | 1.20140E-03 | 0.00000E+00 | 2.74741E-02 | 1.312E-02 |
| 7.20000E-04 | 1.22887E-03 | 0.00000E+00 | 2.74741E-02 | 1.269E-02 |
| 7.20000E-04 | 1.25634E-03 | 0.00000E+00 | 2.74741E-02 | 1.260E-02 |
| 7.20000E-04 | 1.28382E-03 | 0.00000E+00 | 2.74741E-02 | 1.232E-02 |
| 7.20000E-04 | 1.31129E-03 | 0.00000E+00 | 2.74741E-02 | 1.202E-02 |
| 7.20000E-04 | 1.33877E-03 | 0.00000E+00 | 2.74741E-02 | 1.150E-02 |
| 7.20000E-04 | 1.36624E-03 | 0.00000E+00 | 2.74741E-02 | 1.124E-02 |
| 7.20000E-04 | 1.39372E-03 | 0.00000E+00 | 2.74741E-02 | 1.078E-02 |
| 7.20000E-04 | 1.42119E-03 | 0.00000E+00 | 2.74741E-02 | 1.073E-02 |
| 7.20000E-04 | 1.44866E-03 | 0.00000E+00 | 2.74741E-02 | 1.059E-02 |
| 7.20000E-04 | 1.47614E-03 | 0.00000E+00 | 2.74741E-02 | 1.035E-02 |
| 7.20000E-04 | 1.50361E-03 | 0.00000E+00 | 2.74741E-02 | 9.75E-03  |

|             |             |             |             |          |
|-------------|-------------|-------------|-------------|----------|
| 7.20000E-04 | 1.53109E-03 | 0.00000E+00 | 2.74741E-02 | 9.56E-03 |
| 7.20000E-04 | 1.55856E-03 | 0.00000E+00 | 2.74741E-02 | 9.17E-03 |
| 7.20000E-04 | 1.58603E-03 | 0.00000E+00 | 2.74741E-02 | 8.96E-03 |
| 7.20000E-04 | 1.61351E-03 | 0.00000E+00 | 2.74741E-02 | 8.88E-03 |

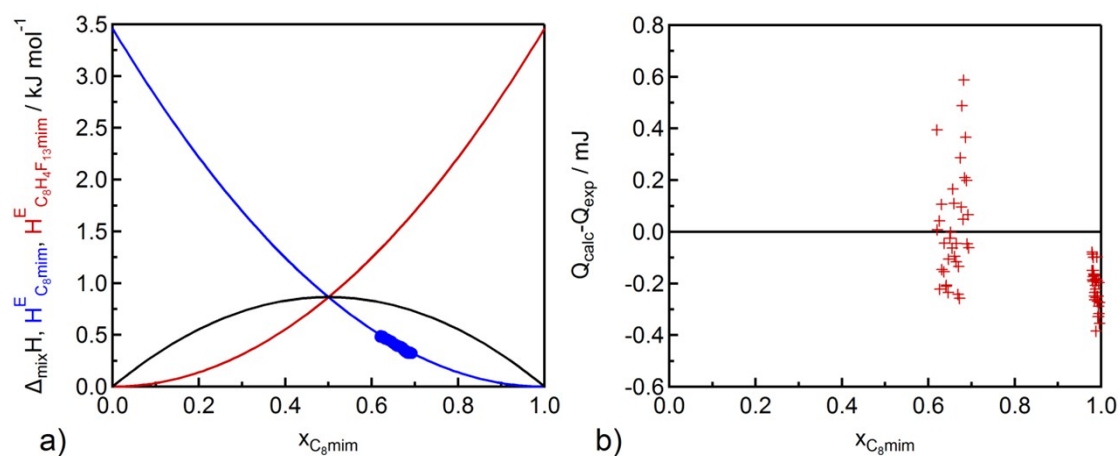

**Figure S2.** a) Partial molar enthalpies,  $H_{C_8H_4F_{13}C_1Im}^E$ , of the components of the mixture  $[C_8C_1Im]_x[C_8H_4F_{13}C_1Im]_{(1-x)}[NTf_2]$  and enthalpy of mixing,  $\Delta_{mix}H$ . Lines are fitting curves and ● are experimental data. In b) are plotted the differences between the experimental heat effects,  $Q_{exp}$ , and the ones calculated using the fitting parameter,  $Q_{calc}$ , as described in Mateolli *et al.*<sup>2</sup>



**Table S5.** Heat effects of mixing perfluorooctane(1) + octane(2) at 353.15 K. The subscripts c and d stands for cell (or container) and dispenser (or syringe), respectively.

| $n_{1c}$ / mol | $n_{2c}$ / mol | $n_{1d}$ / mmol | $n_{2d}$ / mmol | Q / J      |
|----------------|----------------|-----------------|-----------------|------------|
| 3.3413E-03     | 1.1353E-04     | 0.0000E+00      | 4.5662E-02      | 6.1089E-01 |
| 3.3413E-03     | 1.5919E-04     | 0.0000E+00      | 4.5662E-02      | 5.8444E-01 |
| 3.3413E-03     | 2.0486E-04     | 0.0000E+00      | 4.5662E-02      | 5.6130E-01 |
| 3.3413E-03     | 2.5052E-04     | 0.0000E+00      | 4.5662E-02      | 5.3956E-01 |
| 3.3413E-03     | 2.9618E-04     | 0.0000E+00      | 4.5662E-02      | 5.2003E-01 |
| 3.3413E-03     | 3.4184E-04     | 0.0000E+00      | 4.5662E-02      | 5.0592E-01 |
| 3.3413E-03     | 3.8751E-04     | 0.0000E+00      | 4.5662E-02      | 4.8060E-01 |
| 3.3413E-03     | 4.3317E-04     | 0.0000E+00      | 4.5662E-02      | 4.6632E-01 |
| 3.3413E-03     | 4.7883E-04     | 0.0000E+00      | 4.5662E-02      | 4.5023E-01 |
| 3.3413E-03     | 5.2449E-04     | 0.0000E+00      | 4.5662E-02      | 4.3617E-01 |
| 3.3413E-03     | 5.7015E-04     | 0.0000E+00      | 4.5662E-02      | 4.1786E-01 |
| 2.9603E-05     | 5.1629E-03     | 2.9681E-02      | 0.0000E+00      | 4.9650E-01 |
| 5.9284E-05     | 5.1629E-03     | 2.9681E-02      | 0.0000E+00      | 4.7854E-01 |
| 8.8966E-05     | 5.1629E-03     | 2.9681E-02      | 0.0000E+00      | 4.6344E-01 |
| 1.1865E-04     | 5.1629E-03     | 2.9681E-02      | 0.0000E+00      | 4.5152E-01 |
| 1.4833E-04     | 5.1629E-03     | 2.9681E-02      | 0.0000E+00      | 4.3880E-01 |
| 1.7801E-04     | 5.1629E-03     | 2.9681E-02      | 0.0000E+00      | 4.2719E-01 |
| 2.0769E-04     | 5.1629E-03     | 2.9681E-02      | 0.0000E+00      | 4.2046E-01 |
| 2.3737E-04     | 5.1629E-03     | 2.9681E-02      | 0.0000E+00      | 3.9741E-01 |
| 2.6705E-04     | 5.1629E-03     | 2.9681E-02      | 0.0000E+00      | 3.9608E-01 |
| 2.9674E-04     | 5.1629E-03     | 2.9681E-02      | 0.0000E+00      | 3.7061E-01 |
| 3.2642E-04     | 5.1629E-03     | 2.9681E-02      | 0.0000E+00      | 3.5995E-01 |
| 2.0710E-03     | 2.0266E-03     | 2.9681E-02      | 0.0000E+00      | 9.2160E-02 |
| 2.1007E-03     | 2.0266E-03     | 2.9681E-02      | 0.0000E+00      | 9.1430E-02 |
| 2.1304E-03     | 2.0266E-03     | 2.9681E-02      | 0.0000E+00      | 9.1650E-02 |
| 2.1600E-03     | 2.0266E-03     | 2.9681E-02      | 0.0000E+00      | 8.9940E-02 |
| 2.1897E-03     | 2.0266E-03     | 2.9681E-02      | 0.0000E+00      | 8.8000E-02 |
| 2.2194E-03     | 2.0266E-03     | 2.9681E-02      | 0.0000E+00      | 8.8130E-02 |
| 2.2491E-03     | 2.0266E-03     | 2.9681E-02      | 0.0000E+00      | 8.5590E-02 |
| 2.2788E-03     | 2.0266E-03     | 2.9681E-02      | 0.0000E+00      | 8.4710E-02 |
| 2.3085E-03     | 2.0266E-03     | 2.9681E-02      | 0.0000E+00      | 8.4410E-02 |
| 2.3381E-03     | 2.0266E-03     | 2.9681E-02      | 0.0000E+00      | 8.3420E-02 |
| 2.3678E-03     | 2.0266E-03     | 2.9681E-02      | 0.0000E+00      | 8.2130E-02 |
| 1.1381E-03     | 3.4467E-03     | 0.0000E+00      | 3.4275E-02      | 4.1473E-02 |
| 1.1381E-03     | 3.4810E-03     | 0.0000E+00      | 3.4275E-02      | 4.0577E-02 |
| 1.1381E-03     | 3.5153E-03     | 0.0000E+00      | 3.4275E-02      | 3.9421E-02 |
| 1.1381E-03     | 3.5495E-03     | 0.0000E+00      | 3.4275E-02      | 3.9883E-02 |
| 1.1381E-03     | 3.5838E-03     | 0.0000E+00      | 3.4275E-02      | 3.9366E-02 |
| 1.1381E-03     | 3.6181E-03     | 0.0000E+00      | 3.4275E-02      | 3.8985E-02 |
| 1.1381E-03     | 3.6524E-03     | 0.0000E+00      | 3.4275E-02      | 3.8286E-02 |
| 1.1381E-03     | 3.6866E-03     | 0.0000E+00      | 3.4275E-02      | 3.8114E-02 |

**Table S6.** Parameters  $A_i$  of the Redlich-Kister equation (equation 9 in main text) and the partial molar enthalpies at infinite dilution ( $\bar{H}_i^{E,\infty}$ ) for mixing perfluorooctane(1) + octane(2) at 353.15 K.

| System                                                         | kJ mol <sup>-1</sup> |           |         |                           |                           |
|----------------------------------------------------------------|----------------------|-----------|---------|---------------------------|---------------------------|
|                                                                | $A_0$                | $A_1$     | $A_2$   | $\bar{H}_{L1}^{E,\infty}$ | $\bar{H}_{L2}^{E,\infty}$ |
| C <sub>8</sub> H <sub>18</sub> /C <sub>8</sub> F <sub>18</sub> | 12.59631             | - 0.45752 | 3.44480 | 15.584                    | 16.499                    |

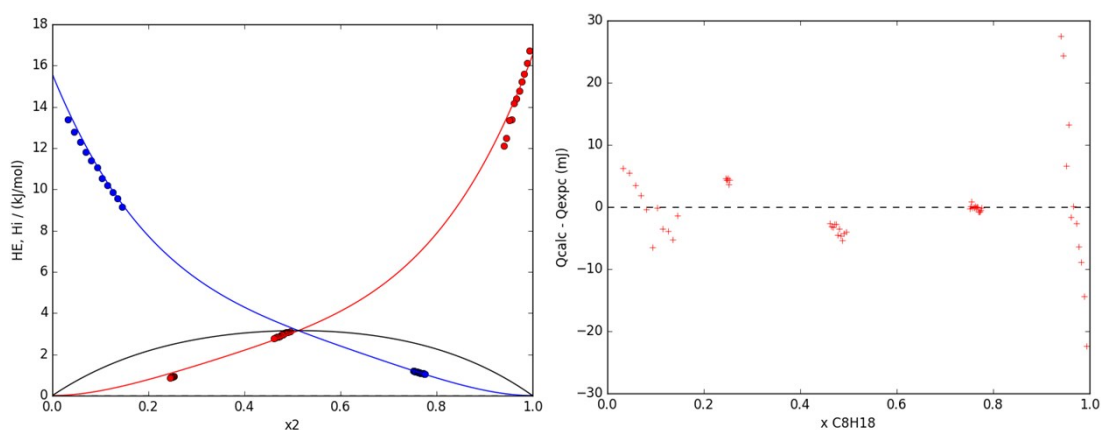

**Figure S3.** Left panel: Partial molar enthalpies,  $H_{E,i}$ , of C<sub>8</sub>H<sub>18</sub> (blue line) and C<sub>8</sub>F<sub>18</sub> (red line) of the mixture C<sub>8</sub>H<sub>18</sub> + C<sub>8</sub>F<sub>18</sub> and their enthalpy of mixing (black line). Symbols stand for the experimental data and solid lines represent fitting results. Right panel: Differences between the experimental heat effects,  $Q_{\text{exp}}$ , and those resulted from fitting,  $Q_{\text{calc}}$ .

**Table S7.** Experimental solubility of CF<sub>4</sub> and C<sub>2</sub>F<sub>6</sub> in [C<sub>8</sub>C<sub>1</sub>Im][NTf<sub>2</sub>] expressed both as Henry's law constants, K<sub>H</sub> and as gas mole fraction, x<sub>gas</sub>, corrected for a partial pressure of solute of 0.1 MPa. p is the experimental equilibrium pressure and the per cent deviation is relative to the correlation of the data.

| $\frac{T}{\text{K}}$                                                                  | $\frac{p}{10^2 \text{Pa}}$ | $\frac{K_H}{10^5 \text{Pa}}$ | $\frac{x_{gas}}{10^{-3}}$ | $\frac{dev}{\%}$ |
|---------------------------------------------------------------------------------------|----------------------------|------------------------------|---------------------------|------------------|
| CF <sub>4</sub> + [C <sub>8</sub> C <sub>1</sub> Im][NTf <sub>2</sub> ]               |                            |                              |                           |                  |
| 303.18                                                                                | 694.53                     | 607.3                        | 1.647                     | + 1.2            |
| 303.18                                                                                | 703.15                     | 633.5                        | 1.579                     | - 3.0            |
| 303.18                                                                                | 760.26                     | 605.2                        | 1.652                     | + 1.6            |
| 313.18                                                                                | 717.27                     | 648.4                        | 1.542                     | + 1.1            |
| 313.18                                                                                | 726.10                     | 663.2                        | 1.508                     | - 1.2            |
| 313.19                                                                                | 785.22                     | 655.3                        | 1.526                     | + 0.0            |
| 323.19                                                                                | 749.05                     | 700.6                        | 1.427                     | + 1.4            |
| 323.19                                                                                | 740.00                     | 692.6                        | 1.444                     | + 2.5            |
| 323.19                                                                                | 810.21                     | 724.6                        | 1.380                     | - 2.0            |
| 333.20                                                                                | 835.21                     | 812.4                        | 1.231                     | - 4.0            |
| 333.20                                                                                | 762.79                     | 766.9                        | 1.304                     | + 1.6            |
| 342.76                                                                                | 784.56                     | 851.9                        | 1.174                     | + 1.0            |
| C <sub>2</sub> F <sub>6</sub> + [C <sub>8</sub> C <sub>1</sub> Im][NTf <sub>2</sub> ] |                            |                              |                           |                  |
| 303.17                                                                                | 669.83                     | 329.0                        | 3.040                     | - 1.3            |
| 303.17                                                                                | 677.15                     | 333.0                        | 3.003                     | - 2.5            |
| 303.17                                                                                | 667.45                     | 314.5                        | 3.180                     | + 3.3            |
| 313.18                                                                                | 689.69                     | 348.6                        | 2.869                     | + 3.5            |
| 313.18                                                                                | 692.27                     | 368.4                        | 2.714                     | - 2.1            |
| 323.19                                                                                | 722.15                     | 405.3                        | 2.467                     | - 2.5            |
| 323.19                                                                                | 711.83                     | 379.2                        | 2.637                     | + 4.3            |
| 323.19                                                                                | 714.59                     | 405.1                        | 2.468                     | - 2.4            |
| 333.19                                                                                | 734.09                     | 429.5                        | 2.328                     | - 0.4            |
| 343.19                                                                                | 759.41                     | 456.4                        | 2.191                     | + 0.4            |

**Table S8.** Experimental solubilities of  $\text{CF}_4$ ,  $\text{C}_2\text{F}_6$  and  $\text{C}_3\text{F}_8$  in  $[\text{C}_8\text{H}_4\text{F}_{13}\text{C}_1\text{Im}][\text{NTf}_2]$  expressed both as Henry's law constants,  $K_H$  and as gas mole fraction,  $x_{\text{gas}}$ , corrected for a partial pressure of solute of 0.1 MPa.  $p$  is the experimental equilibrium pressure and the per cent deviation is relative to the correlation of the data.

| $T$<br>K                                                                                      | $p$<br>$10^2\text{Pa}$ | $K_H$<br>$10^5\text{Pa}$ | $x_{\text{gas}}$<br>$10^{-3}$ | $dev$<br>% |
|-----------------------------------------------------------------------------------------------|------------------------|--------------------------|-------------------------------|------------|
| $\text{CF}_4 + [\text{C}_8\text{H}_4\text{F}_{13}\text{C}_1\text{Im}][\text{NTf}_2]$          |                        |                          |                               |            |
| 303.16                                                                                        | 682.48                 | 221.8                    | 4.508                         | - 0.8      |
| 303.17                                                                                        | 688.93                 | 219.9                    | 4.548                         | + 0.1      |
| 313.15                                                                                        | 711.50                 | 237.3                    | 4.215                         | + 1.6      |
| 313.16                                                                                        | 705.02                 | 241.3                    | 4.145                         | - 0.1      |
| 323.16                                                                                        | 727.64                 | 267.4                    | 3.739                         | - 1.2      |
| 323.17                                                                                        | 734.16                 | 259.9                    | 3.847                         | + 1.7      |
| 333.15                                                                                        | 750.30                 | 300.6                    | 3.326                         | - 3.7      |
| 333.18                                                                                        | 756.83                 | 285.5                    | 3.502                         | + 1.4      |
| 343.16                                                                                        | 779.36                 | 313.2                    | 3.193                         | + 1.2      |
| $\text{C}_2\text{F}_6 + [\text{C}_8\text{H}_4\text{F}_{13}\text{C}_1\text{Im}][\text{NTf}_2]$ |                        |                          |                               |            |
| 303.15                                                                                        | 670.93                 | 99.39                    | 10.06                         | - 2.2      |
| 303.16                                                                                        | 643.84                 | 96.03                    | 10.41                         | + 1.2      |
| 303.16                                                                                        | 628.00                 | 95.38                    | 10.48                         | + 1.9      |
| 313.13                                                                                        | 665.50                 | 112.3                    | 8.904                         | + 0.7      |
| 313.14                                                                                        | 650.10                 | 111.9                    | 8.938                         | + 1.1      |
| 313.16                                                                                        | 666.10                 | 114.9                    | 8.704                         | - 1.5      |
| 313.17                                                                                        | 694.37                 | 115.4                    | 8.667                         | - 1.9      |
| 318.16                                                                                        | 692.03                 | 124.1                    | 8.059                         | - 1.2      |
| 323.13                                                                                        | 672.13                 | 131.2                    | 7.623                         | + 1.3      |
| 323.14                                                                                        | 687.47                 | 130.3                    | 7.676                         | + 2.0      |
| 323.17                                                                                        | 717.82                 | 136.1                    | 7.350                         | - 2.3      |
| 323.18                                                                                        | 703.33                 | 132.9                    | 7.523                         | + 0.1      |
| 333.04                                                                                        | 725.48                 | 152.6                    | 6.554                         | + 2.9      |
| 333.14                                                                                        | 694.18                 | 154.9                    | 6.455                         | + 1.5      |
| 333.16                                                                                        | 741.20                 | 161.3                    | 6.201                         | - 2.4      |
| 343.19                                                                                        | 716.45                 | 189.2                    | 5.284                         | - 1.1      |
| $\text{C}_3\text{F}_8 + [\text{C}_8\text{H}_4\text{F}_{13}\text{C}_1\text{Im}][\text{NTf}_2]$ |                        |                          |                               |            |
| 303.16                                                                                        | 618.08                 | 39.39                    | 25.38                         | + 0.7      |
| 313.17                                                                                        | 660.17                 | 49.33                    | 20.27                         | - 1.6      |
| 313.17                                                                                        | 656.22                 | 48.94                    | 20.43                         | - 0.8      |
| 313.18                                                                                        | 643.39                 | 48.28                    | 20.71                         | + 0.6      |
| 323.13                                                                                        | 680.21                 | 59.22                    | 16.89                         | + 0.1      |
| 323.14                                                                                        | 684.18                 | 59.28                    | 16.87                         | + 0.0      |
| 323.19                                                                                        | 668.17                 | 58.83                    | 17.00                         | + 0.9      |
| 333.21                                                                                        | 692.67                 | 72.04                    | 13.88                         | + 0.5      |
| 343.21                                                                                        | 716.75                 | 88.30                    | 11.32                         | - 0.4      |

**Table S9.** Experimental solubilities of CF<sub>4</sub>, C<sub>2</sub>F<sub>6</sub> and C<sub>3</sub>F<sub>8</sub> in [C<sub>8</sub>C<sub>1</sub>Im][BETI] expressed both as Henry's law constants, K<sub>H</sub> and as gas mole fraction, x<sub>gas</sub>, corrected for a partial pressure of solute of 0.1 MPa. p is the experimental equilibrium pressure and the per cent deviation is relative to the correlation of the data.

| $\frac{T}{\text{K}}$                                                     | $\frac{p}{10^2 \text{Pa}}$ | $\frac{K_H}{10^5 \text{Pa}}$ | $\frac{x_{gas}}{10^{-3}}$ | $\frac{dev}{\%}$ |
|--------------------------------------------------------------------------|----------------------------|------------------------------|---------------------------|------------------|
| CF <sub>4</sub> + [C <sub>8</sub> C <sub>1</sub> Im][BETI]               |                            |                              |                           |                  |
| 303.16                                                                   | 724.97                     | 315.8                        | 3.167                     | - 1.4            |
| 303.17                                                                   | 707.29                     | 305.0                        | 3.279                     | + 2.1            |
| 313.15                                                                   | 748.73                     | 335.9                        | 2.977                     | - 1.9            |
| 313.18                                                                   | 730.56                     | 327.7                        | 3.052                     | + 0.6            |
| 323.16                                                                   | 772.52                     | 359.0                        | 2.786                     | - 1.3            |
| 323.18                                                                   | 753.77                     | 348.7                        | 2.868                     | + 1.6            |
| 333.17                                                                   | 796.41                     | 394.0                        | 2.538                     | - 2.1            |
| 333.19                                                                   | 776.98                     | 373.3                        | 2.679                     | + 3.4            |
| 343.16                                                                   | 820.29                     | 438.5                        | 2.281                     | - 3.2            |
| 343.20                                                                   | 800.36                     | 413.9                        | 2.416                     | + 2.6            |
| C <sub>2</sub> F <sub>6</sub> + [C <sub>8</sub> C <sub>1</sub> Im][BETI] |                            |                              |                           |                  |
| 303.15                                                                   | 633.45                     | 169.7                        | 5.893                     | + 0.1            |
| 303.15                                                                   | 656.58                     | 169.8                        | 5.889                     | + 0.1            |
| 303.17                                                                   | 646.92                     | 170.9                        | 5.850                     | - 0.6            |
| 313.16                                                                   | 655.13                     | 195.1                        | 5.125                     | - 0.5            |
| 313.17                                                                   | 679.00                     | 192.2                        | 5.203                     | + 1.1            |
| 313.20                                                                   | 669.04                     | 195.1                        | 5.126                     | - 0.4            |
| 323.16                                                                   | 676.72                     | 222.5                        | 4.495                     | + 1.6            |
| 323.17                                                                   | 701.54                     | 223.4                        | 4.477                     | + 1.2            |
| 323.21                                                                   | 691.27                     | 229.0                        | 4.368                     | - 1.2            |
| 333.12                                                                   | 698.42                     | 265.4                        | 3.768                     | + 0.5            |
| 333.18                                                                   | 735.04                     | 263.3                        | 3.798                     | + 1.4            |
| 333.18                                                                   | 713.55                     | 278.9                        | 3.586                     | - 4.3            |
| 343.18                                                                   | 746.63                     | 311.6                        | 3.209                     | + 2.2            |
| 343.18                                                                   | 720.33                     | 322.3                        | 3.103                     | - 1.2            |
| C <sub>3</sub> F <sub>8</sub> + [C <sub>8</sub> C <sub>1</sub> Im][BETI] |                            |                              |                           |                  |
| 303.17                                                                   | 702.40                     | 83.46                        | 11.98                     | + 0.3            |
| 303.18                                                                   | 663.17                     | 84.16                        | 11.88                     | - 0.5            |
| 313.16                                                                   | 727.99                     | 97.50                        | 10.26                     | + 0.8            |
| 313.18                                                                   | 687.44                     | 98.50                        | 10.15                     | - 0.2            |
| 323.16                                                                   | 753.31                     | 113.1                        | 8.843                     | + 0.4            |
| 323.17                                                                   | 711.39                     | 114.0                        | 8.773                     | - 0.3            |
| 333.14                                                                   | 735.04                     | 130.9                        | 7.640                     | - 1.0            |
| 333.14                                                                   | 778.25                     | 129.1                        | 7.749                     | + 0.4            |
| 343.09                                                                   | 758.22                     | 146.8                        | 6.811                     | - 0.6            |
| 343.12                                                                   | 802.80                     | 144.5                        | 6.921                     | + 1.0            |

**Table S10.** Experimental solubilities of CF<sub>4</sub>, C<sub>2</sub>F<sub>6</sub> and C<sub>3</sub>F<sub>8</sub> in [C<sub>8</sub>H<sub>4</sub>F<sub>13</sub>C<sub>1</sub>Im][BETI] expressed both as Henry's law constants, K<sub>H</sub> and as gas mole fraction, x<sub>gas</sub>, corrected for a partial pressure of solute of 0.1 MPa. p is the experimental equilibrium pressure and the per cent deviation is relative to the correlation of the data.

| $\frac{T}{\text{K}}$                                                                                    | $\frac{p}{10^2 \text{Pa}}$ | $\frac{K_H}{10^5 \text{Pa}}$ | $\frac{x_{\text{gas}}}{10^{-3}}$ | $\frac{\text{dev}}{\%}$ |
|---------------------------------------------------------------------------------------------------------|----------------------------|------------------------------|----------------------------------|-------------------------|
| CF <sub>4</sub> + [C <sub>8</sub> H <sub>4</sub> F <sub>13</sub> C <sub>1</sub> Im][BETI]               |                            |                              |                                  |                         |
| 318.15                                                                                                  | 729.62                     | 190.0                        | 5.263                            | + 2.5                   |
| 318.19                                                                                                  | 726.10                     | 200.8                        | 4.981                            | - 3.0                   |
| 323.13                                                                                                  | 741.05                     | 202.4                        | 4.940                            | + 1.6                   |
| 323.19                                                                                                  | 737.45                     | 206.8                        | 4.836                            | - 0.5                   |
| 333.17                                                                                                  | 760.31                     | 227.0                        | 4.406                            | - 1.0                   |
| 333.20                                                                                                  | 764.03                     | 223.9                        | 4.467                            | + 0.4                   |
| 343.07                                                                                                  | 782.73                     | 239.0                        | 4.185                            | + 0.2                   |
| C <sub>2</sub> F <sub>6</sub> + [C <sub>8</sub> H <sub>4</sub> F <sub>13</sub> C <sub>1</sub> Im][BETI] |                            |                              |                                  |                         |
| 318.16                                                                                                  | 697.15                     | 93.44                        | 10.70                            | - 0.6                   |
| 318.18                                                                                                  | 633.86                     | 91.14                        | 10.97                            | + 2.0                   |
| 318.20                                                                                                  | 710.33                     | 93.43                        | 10.70                            | - 0.5                   |
| 323.15                                                                                                  | 708.62                     | 100.7                        | 9.929                            | - 0.4                   |
| 323.18                                                                                                  | 722.12                     | 102.5                        | 9.758                            | - 2.1                   |
| 323.19                                                                                                  | 644.39                     | 99.38                        | 10.06                            | + 1.0                   |
| 333.19                                                                                                  | 745.57                     | 121.5                        | 8.230                            | - 1.1                   |
| 333.21                                                                                                  | 665.37                     | 117.6                        | 8.503                            | + 2.3                   |
| 343.12                                                                                                  | 755.05                     | 150.7                        | 6.636                            | - 1.6                   |
| 343.23                                                                                                  | 769.31                     | 151.1                        | 6.619                            | - 1.6                   |
| 343.24                                                                                                  | 686.52                     | 144.6                        | 6.916                            | + 2.8                   |
| C <sub>3</sub> F <sub>8</sub> + [C <sub>8</sub> H <sub>4</sub> F <sub>13</sub> C <sub>1</sub> Im][BETI] |                            |                              |                                  |                         |
| 318.20                                                                                                  | 719.25                     | 39.92                        | 25.05                            | + 1.0                   |
| 318.18                                                                                                  | 692.66                     | 39.87                        | 25.08                            | + 1.1                   |
| 323.17                                                                                                  | 705.40                     | 43.58                        | 22.95                            | - 1.8                   |
| 323.20                                                                                                  | 732.64                     | 43.80                        | 22.83                            | - 2.3                   |
| 333.17                                                                                                  | 730.48                     | 51.60                        | 19.38                            | + 1.5                   |
| 333.22                                                                                                  | 758.73                     | 51.72                        | 19.33                            | + 1.4                   |
| 343.17                                                                                                  | 787.21                     | 71.29                        | 14.03                            | - 0.9                   |

**Table S11.** Parameters of equation (5) used to smooth the experimental results on  $K_H$  from Tables 1, 2, 3, 4 along with the standard deviation of the fit,  $s$ .

| Ionic liquid                 | $A_0$   | $A_1 / K$             | $A_2 / K_2$           | $S$ |
|------------------------------|---------|-----------------------|-----------------------|-----|
| $CF_4$                       |         |                       |                       |     |
| $[C_8C_1Im][NTf_2]$          | + 19.00 | $- 7.128 \times 10^3$ | $- 10.05 \times 10^5$ | 1.7 |
| $[C_8H_4F_{13}C_1Im][NTf_2]$ | + 11.25 | $- 2.708 \times 10^3$ | $+ 2.831 \times 10^5$ | 1.3 |
| $[C_8C_1Im][BETI]$           | + 17.63 | $- 6.770 \times 10^3$ | $+ 9.599 \times 10^5$ | 2.0 |
| $[C_8H_4F_{13}C_1Im][BETI]$  | - 2.58  | $+ 6.169 \times 10^3$ | $- 11.68 \times 10^5$ | 1.3 |
| $C_2F_6$                     |         |                       |                       |     |
| $[C_8C_1Im][NTf_2]$          | + 5.140 | $+ 1.427 \times 10^3$ | $- 3,737 \times 10^5$ | 2.3 |
| $[C_8H_4F_{13}C_1Im][NTf_2]$ | + 19.15 | $- 7.495 \times 10^3$ | $+ 9.324 \times 10^5$ | 1.6 |
| $[C_8C_1Im][BETI]$           | + 23.09 | $- 9.758 \times 10^3$ | $+ 13.08 \times 10^5$ | 1.2 |
| $[C_8H_4F_{13}C_1Im][BETI]$  | + 34.95 | $- 17.91 \times 10^3$ | $+ 26.18 \times 10^5$ | 1.4 |
| $C_3F_8$                     |         |                       |                       |     |
| $[C_8H_4F_{13}C_1Im][NTf_2]$ | + 15.54 | $- 5.327 \times 10^3$ | $+ 5.246 \times 10^5$ | 0.6 |
| $[C_8C_1Im][BETI]$           | + 6.62  | $+ 0.221 \times 10^3$ | $- 2.686 \times 10^5$ | 0.6 |
| $[C_8H_4F_{13}C_1Im][BETI]$  | + 73.89 | $- 43.78 \times 10^3$ | $+ 68.24 \times 10^5$ | 1.5 |

**Figure S4.** Mole fraction solubility of tetrafluoromethane ( $\text{CF}_4$ ) in the 1-alkyl-3-methylimidazolium bis(trifluoromethylsulfonyl)amide ionic liquids,  $[\text{C}_n\text{C}_1\text{Im}][\text{NTf}_2]$ , as a function of the alkyl-side chain in the cation. Symbols  $\times$  and  $\bullet$  stand for  $n = 6$  and  $n = 8$  in  $[\text{C}_n\text{C}_1\text{Im}][\text{NTf}_2]$ , respectively.  $\text{CF}_4$  solubility data in the  $[\text{C}_6\text{C}_1\text{Im}][\text{NTf}_2]$  were reported in ref <sup>3</sup>.

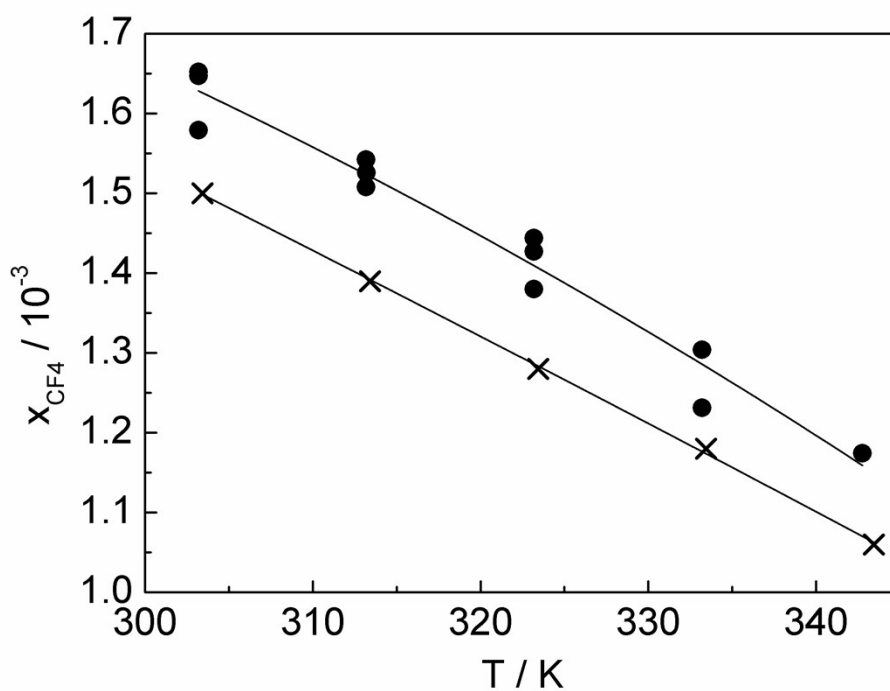



**Table S12.** Thermodynamic properties of CF<sub>4</sub>, C<sub>2</sub>F<sub>6</sub> and C<sub>3</sub>F<sub>8</sub> solvation in the ionic liquids studied at 323 K.

| Ionic liquid                                                                         | $\Delta_{\text{soln}} H^\infty / \text{kJmol}^{-1}$ | $T\Delta_{\text{soln}} S^\infty / \text{kJmol}^{-1}$ |
|--------------------------------------------------------------------------------------|-----------------------------------------------------|------------------------------------------------------|
| CF <sub>4</sub>                                                                      |                                                     |                                                      |
| [C <sub>8</sub> C <sub>1</sub> Im][NTf <sub>2</sub> ]                                | - 7 ± 1                                             | - 25 ± 2                                             |
| [C <sub>8</sub> H <sub>4</sub> F <sub>13</sub> C <sub>1</sub> Im][NTf <sub>2</sub> ] | - 8 ± 1                                             | - 23 ± 1                                             |
| [C <sub>8</sub> C <sub>1</sub> Im][BETI]                                             | - 7 ± 1                                             | - 23 ± 2                                             |
| [C <sub>8</sub> H <sub>4</sub> F <sub>13</sub> C <sub>1</sub> Im][BETI]              | - 8.8 ± 0.8                                         | - 23.1 ± 0.5                                         |
| C <sub>2</sub> F <sub>6</sub>                                                        |                                                     |                                                      |
| [C <sub>8</sub> C <sub>1</sub> Im][NTf <sub>2</sub> ]                                | - 7.4 ± 0.4                                         | - 23.6 ± 0.1                                         |
| [C <sub>8</sub> H <sub>4</sub> F <sub>13</sub> C <sub>1</sub> Im][NTf <sub>2</sub> ] | - 14 ± 1                                            | - 27 ± 1                                             |
| [C <sub>8</sub> C <sub>1</sub> Im][BETI]                                             | - 14 ± 2                                            | - 28 ± 2                                             |
| [C <sub>8</sub> H <sub>4</sub> F <sub>13</sub> C <sub>1</sub> Im][BETI]              | - 14 ± 2                                            | - 30 ± 3                                             |
| C <sub>3</sub> F <sub>8</sub>                                                        |                                                     |                                                      |
| [C <sub>8</sub> H <sub>4</sub> F <sub>13</sub> C <sub>1</sub> Im][NTf <sub>2</sub> ] | - 17.3 ± 0.5                                        | - 28 ± 1                                             |
| [C <sub>8</sub> C <sub>1</sub> Im][BETI]                                             | - 12.1 ± 0.3                                        | - 24.8 ± 0.2                                         |
| [C <sub>8</sub> H <sub>4</sub> F <sub>13</sub> C <sub>1</sub> Im][BETI]              | - 13 ± 3                                            | - 23 ± 3                                             |

## References

1. Bedford, R. G.; Dunlap, R. D., Solubilities and Volume Changes Attending Mixing for the System: Perfluoro-n-hexane-n-Hexane. *J. Am. Chem. Soc.* **1958**, *80* (2), 282-285.
2. Matteoli, E.; Lepori, L., Determination of the excess enthalpy of binary mixtures from the measurements of the heat of solution of the components: application to the perfluorohexane + hexane mixture. *Fluid Phase Equilib.* **2000**, *174* (1-2), 115-131.
3. Pison, L.; Lopes, J. N. C.; Rebelo, L. P. N.; Padua, A. A. H.; Costa Gomes, M. F., Interactions of fluorinated gases with ionic liquids: Solubility of CF<sub>4</sub>, C<sub>2</sub>F<sub>6</sub>, and C<sub>3</sub>F<sub>8</sub> in trihexyltetradecylphosphonium bis(trifluoromethylsulfonyl)amide. *J. Phys. Chem. B* **2008**, *112* (39), 12394-12400.
